# Supplementary material for: Identifying Rare Genetic Variants of Immune Mediators as Risk Factors for Autism Spectrum Disorder
Source: Genes (Basel). 2022 Jun 20;13(6):1098. doi: 10.3390/genes13061098 (PMC9223212; doi:10.3390/genes13061098)
Supplement: Supplementary file 1 [file genes-13-01098-s001.zip › Supplementary Tables.xlsx]

## Sheet: Legends
Supplementary Table 1	Significantly different point mutations identified in discovery stage;
Supplementary Table 2	Significantly different point mutations identified in validate stage;
Supplementary Table 3	Significantly different point mutations identified in discovery and validate stage;
Supplementary Table 4	Primers for four rare variants
Supplementary Table 5	Metadata and immune gene variant counts

## Sheet: ST1
Chr	Start	Ref	Alt	Discovery.ASD	Discovery.HC	Discovery.fisher.p	Discovery.fisher.or	Gene.refGene	avsnp150
chr19	54782407	C	T	8	0	0.000414779	Inf	LILRB2	rs1128646
chr19	54782420	G	A	8	0	0.000414779	Inf	LILRB2	rs11666104
chr6	150209805	-	A,AA,AAA,AAAA,AAAAA	37	41	0.000579916	Inf	RAET1E	rs765094508
chr16	70694000	C	A	10	5	0.0411663	3.64805	IL34	rs4985556
chr19	3595077	A,AA	-	14	6	0.00384825	4.8766	TBXA2R	rs543155102
chr6	32552129	-	A,ACCCGTAGAGTACT,AGA	4	0	0.0236368	Inf	HLA-DRB1	.
chr6	32632801	G	A	11	0	1.59062e-05	Inf	HLA-DQB1	rs3204373
chr19	55494204	C	T	4	0	0.0236368	Inf	NLRP2	rs189403101
chr1	159175428	C	T	14	8	0.0133358	3.5229	ACKR1	rs118062001
chr10	95326676	C	T	22	44	0.0369384	0.370942	FFAR4	rs61866610
chr4	38776491	T	G	23	51	0.000424406	0.132077	TLR10	rs11096957
chr11	7079038	G	A	36	44	0.0239667	8.84304	NLRP14	rs10839708
chr19	56466574	A	G	4	0	0.0236368	Inf	NLRP8	rs191636423
chr19	54778694	G	A	7	0	0.00117521	Inf	LILRB2	rs62134981
chr19	56419263	T	C	5	18	0.0495237	0.324951	NLRP13	rs17711239
chr17	16842991	G	A	24	23	0.0353928	2.54157	TNFRSF13B	rs34562254
chr19	55501348	-	A	0	7	0.0389343	0	NLRP2	rs35241109
chr2	219028932	G	A	5	1	0.0368816	8.25515	CXCR1	rs16858808
chr21	34634878	G	A	27	26	0.0183359	2.97494	IFNAR2	rs1131668
chr6	137536455	G	A	14	8	0.0133358	3.5229	IFNGR1	rs1327475
chrX	12924826	A	G	36	43	0.012629	9.86391	TLR8	rs3764880
chr2	102793533	C	G	7	23	0.0248591	0.328557	IL1R1	rs3917324
chr2	228680154	T	-	12	44	8.14388e-06	0.123432	CCL20	rs34834265
chr17	38712160	-	T	2	31	1.85092e-07	0.0456998	CCR7	rs372297045
chr1	207014472	A	C	27	25	0.0106942	3.19769	IL19	rs2243188
chr9	21207073	A	C	1	9	0.0456314	0.144264	IFNA10	rs147125948
chr6	137330733	TTTTT,TTTTTT,TTTTTTT	-	10	5	0.0411663	3.64805	IL20RA	.
chr6	32629603	T	C	2	14	0.0130174	0.170093	HLA-DQB1	rs9273852
chr1	158224825	C	T	36	44	0.0239667	8.84304	CD1A	rs411089
chr1	158297960	C	T	27	25	0.0106942	3.19769	CD1B	rs16840096
chr1	158260879	T	-	1	9	0.0456314	0.144264	CD1C	rs375739413
chr19	55501349	A,AA	-	20	42	0.0403493	0.368438	NLRP2	rs202147826
chr18	67613944	-	A	13	32	0.0353928	0.393457	CD226	rs397966834
chr2	102792785	T	G	9	2	0.00603521	8.3196	IL1R1	rs112972404
chr19	6586498	T	C	0	7	0.0389343	0	CD70	rs16994592
chr2	102793246	A	G	9	2	0.00603521	8.3196	IL1R1	rs3917322
chr19	56515467	C	T	10	5	0.0411663	3.64805	NLRP5	rs80299465
chr16	10996137	A	C	7	0	0.00117521	Inf	CIITA	rs146990823
chr16	11003967	G	A	7	0	0.00117521	Inf	CIITA	rs145553216
chr5	149456771	C	A	2	12	0.0392423	0.20777	CSF1R	rs2855781
chr5	149456772	T	A	2	12	0.0392423	0.20777	CSF1R	rs60844779
chr4	74736144	A	G	33	39	0.0423909	3.34347	CXCL1	rs4074
chr5	134907433	TTTTTTTTTTTTTTT,TTTTTTTTTTTTTTTT,TTTTTTTTTTTTTTTTT,TTTTTTTTTTTTTTTTTT,TTTTTTTTTTTTTTTTTTT,TTTTTTTTTTTTTTTTTTTT,TTTTTTTTTTTTTTTTTTTTT,TTTTTTTTTTTTTTTTTTTTTT,TTTTTTTTTTTTTTTTTTTTTTT,TTTTTTTTTTTTTTTTTTTTTTTT,TTTTTTTTTTTTTTTTTTTTTTTTT,TTTTTTTTTTTTTTTTTTTTTTTTTT,TTTTTTTTTTTTTTTTTTTTTTTTTTTT,TTTTTTTTTTTTTTTTTTTTTTTTTTTTTT	-	24	19	0.00566506	3.44746	CXCL14	.
chr3	46063329	T	C	2	14	0.0130174	0.170093	XCR1	rs2230322
chr2	219030077	G	A	5	1	0.0368816	8.25515	CXCR1	rs16858816
chr6	32489744	G	A,T	18	13	0.023616	3.02105	HLA-DRB5	rs1059598
chr20	44756943	-	T,TT,TTT	21	18	0.0313412	2.66749	CD40	rs749590513
chr11	118754518	T	A	14	8	0.0133358	3.5229	CXCR5	rs2276344
chr10	90770439	C	G	22	45	0.0303115	0.330219	FAS	rs2296600
chr1	172628781	-	T	1	19	0.000188308	0.0538843	FASLG	.
chr8	23058188	T	C	3	15	0.0312245	0.238606	TNFRSF10A	rs4872077
chr19	52149165	G	A	5	0	0.00886382	Inf	SIGLEC14	rs4802834
chr5	156525921	AG	-	19	46	0.00114837	0.21052	HAVCR2	rs371359315
chr1	207040659	G	A	24	19	0.00566506	3.44746	IL20	rs2232360
chr3	46450297	A	G	1	11	0.0239667	0.113083	CCRL2	rs3204850
chr3	46306700	T	C	1	10	0.0450118	0.12712	CCR3	rs4987053
chr6	31324448	G	A	5	0	0.00886382	Inf	HLA-B	rs17881210
chr2	219029843	A	C	5	1	0.0368816	8.25515	CXCR1	rs16858811
chr6	32610281	C	T	12	32	0.0196547	0.349141	HLA-DQA1	rs9272777
chr6	32610282	T	G	12	32	0.0196547	0.349141	HLA-DQA1	rs9272778
chr6	32610349	C	A	12	32	0.0196547	0.349141	HLA-DQA1	rs9272780
chr6	32610436	T	C	6	21	0.0347438	0.317204	HLA-DQA1	rs1048372
chr6	32610757	A	G	6	21	0.0347438	0.317204	HLA-DQA1	rs8227
chr6	32609371	T	C	13	33	0.0328337	0.365285	HLA-DQA1	rs4467816
chr6	32606701	A	G	15	35	0.0346667	0.39379	HLA-DQA1	rs28636516
chr6	32629053	C	A	8	1	0.00258743	14.5008	HLA-DQB1	rs9273580
chr6	31324530	G	C	6	0	0.00326025	Inf	HLA-B	rs41546313
chr6	31324154	G	A	8	1	0.00258743	14.5008	HLA-B	rs1050379
chr1	71440217	C	T	31	29	0.00335567	4.5562	PTGER3	rs2072947
chr6	32634282	A	G	7	2	0.0275049	6.06074	HLA-DQB1	rs12722106
chr6	32629047	-	C	4	0	0.0236368	Inf	HLA-DQB1	rs9282090
chr6	32629051	T	C	7	1	0.00649821	12.2852	HLA-DQB1	rs180806056
chr2	219000292	C	T	5	1	0.0368816	8.25515	CXCR2	rs11574750
chr6	32629048	A	G	6	1	0.0157705	10.209	HLA-DQB1	rs281864316
chr6	32489795	T	A,C	18	14	0.0270059	2.74192	HLA-DRB5	rs144532965
chr4	123374820	T	-	0	18	2.79393e-05	0	IL2	rs368686382
chr6	32632833	A	G	11	2	0.000615873	10.9145	HLA-DQB1	rs12722107
chr19	54782724	G	A	8	1	0.00258743	14.5008	LILRB2	rs7247538
chr6	32632427	C	-	7	22	0.0405596	0.353926	HLA-DQB1	rs70996721
chr6	32632587	A	G	9	26	0.0303633	0.362545	HLA-DQB1	rs1130397
chr6	32629868	A	G	8	24	0.0439186	0.360302	HLA-DQB1	rs1049088
chr6	32629847	A	G	8	24	0.0439186	0.360302	HLA-DQB1	rs1049133
chr6	32629859	A	G	8	24	0.0439186	0.360302	HLA-DQB1	rs1049130
chr6	32552239	C	T	4	0	0.0236368	Inf	HLA-DRB1	rs9269967
chr6	32552123	G	A	4	0	0.0236368	Inf	HLA-DRB1	rs17879702
chr11	7071027	G	A	5	0	0.00886382	Inf	NLRP14	rs186983128
chr6	31324509	T	A	10	0	4.83076e-05	Inf	HLA-B	rs41553715
chr19	54782704	G	C	8	2	0.0130046	7.15242	LILRB2	rs7247451
chr1	158263011	T	C	11	6	0.0295938	3.40579	CD1C	rs3138105
chr19	45150614	G	A	4	16	0.0423909	0.29909	PVR	rs1058402
chr6	32489749	G	A,C	22	18	0.0178326	2.97672	HLA-DRB5	rs1064594
chr6	32489791	A	C,G	22	20	0.0346667	2.53943	HLA-DRB5	rs41550412
chr2	204824178	-	GT	4	0	0.0236368	Inf	ICOS	rs111245028
chr2	204824179	GT,GTGT	-	19	41	0.0270059	0.364708	ICOS	rs112626862
chr3	53899178	T	C	6	21	0.0347438	0.317204	IL17RB	rs2232350
chr6	137519588	A	C	14	8	0.0133358	3.5229	IFNGR1	rs11914
chr6	137524872	-,A	-,A,AA	8	3	0.0248787	4.69768	IFNGR1	.
chr6	137524871	A,AA	-	15	9	0.0148275	3.434	IFNGR1	rs34561084
chr1	207015957	T	C	26	20	0.00267983	4.06819	IL19	rs2243191
chr21	34799084	-	TA,TATA	11	33	0.00570845	0.28616	IFNGR2	rs146481328
chr1	24486227	G	T	2	14	0.0130174	0.170093	IFNLR1	rs10903037
chr19	18172081	C	T	7	1	0.00649821	12.2852	IL12RB1	rs138286388
chr19	18172082	C	T	7	1	0.00649821	12.2852	IL12RB1	rs149635968
chr19	18172841	A	G	4	17	0.0409853	0.274516	IL12RB1	rs17878533
chr1	67861520	C	A	22	45	0.0303115	0.330219	IL12RB2	rs2229546
chr1	67852335	G	A	20	41	0.0468513	0.405938	IL12RB2	rs2228420
chr2	113672908	A	G	7	2	0.0275049	6.06074	IL37	rs144486419
chrX	117904185	A	G	12	35	0.00540289	0.278428	IL13RA1	rs2248849
chrX	117904229	T	C	12	35	0.00540289	0.278428	IL13RA1	rs2248846
chrX	117910545	A	T	12	35	0.00540289	0.278428	IL13RA1	rs3121671
chrX	117925898	A	G	12	35	0.00540289	0.278428	IL13RA1	rs2495636
chrX	117892291	C	G	13	34	0.0188549	0.338759	IL13RA1	rs2997048
chrX	117904433	T	C	15	36	0.0207609	0.364072	IL13RA1	rs2248841
chrX	117910551	G	A	15	36	0.0207609	0.364072	IL13RA1	rs3125163
chr19	54781541	C	T	30	55	0.00117521	0	LILRB2	rs450937
chr15	81571849	T	A	18	12	0.0119632	3.34614	IL16	rs59298568
chr3	53889172	G	C	6	21	0.0347438	0.317204	IL17RB	rs28385745
chr3	53886276	G	A	6	21	0.0347438	0.317204	IL17RB	rs3733072
chr16	27374400	A	G	17	13	0.0403493	2.71416	IL4R	rs1801275
chr3	57176505	A	G	16	38	0.017873	0.34511	IL17RD	rs1386829
chr2	102979238	-	T	2	24	4.03178e-05	0.0756375	IL18R1	rs879330901
chr2	103003550	C	A	5	1	0.0368816	8.25515	IL18R1	rs55944637
chr6	32629936	C	T	8	24	0.0439186	0.360302	HLA-DQB1	rs1049107
chr1	78998059	-	TA,TATA,TATATA,TATATATA	5	0	0.00886382	Inf	PTGFR	.
chr2	102788492	-,T,TT,TTT,TTTT	-,TT,TTTTT	18	10	0.00262005	4.18879	IL1R1	rs36117187
chr2	102641201	A	G	20	17	0.0318126	2.60084	IL1R2	rs3218977
chr2	102957628	-	T,TT	10	35	0.000689268	0.215565	IL1RL1	rs201528268
chr2	102957423	A	T	6	0	0.00326025	Inf	IL1RL1	rs190601634
chr2	102955524	T	-	1	9	0.0456314	0.144264	IL1RL1	rs3214363
chr6	150266740	A	G	0	10	0.00505351	0	ULBP2	rs62439758
chr3	112218319	-	A,AA,AAA	15	8	0.00678536	3.94011	BTLA	rs569210512
chr5	55252985	A	-	11	34	0.00307591	0.265395	IL6ST	rs879037844
chr18	67563417	-	T,TT,TTT,TTTT	35	42	0.0226708	5.33366	CD226	rs33943534
chr6	137330732	TTTT,TTTTT,TTTTTT,TTTTTTT,TTTTTTTT	-	34	39	0.0179367	4.58114	IL20RA	rs527853497
chr6	137325903	A,AA	-	31	33	0.0204756	3.39986	IL20RA	.
chr3	136699135	T	-	4	21	0.00411886	0.199511	IL20RB	.
chr3	136708237	-	C	4	0	0.0236368	Inf	IL20RB	rs562077692
chr4	123536687	-,A	-,A	13	5	0.00296445	5.30927	IL21	.
chr12	56733531	G	A	0	7	0.0389343	0	IL23A	rs11171806
chr19	14160161	C	-	9	4	0.0316314	4.03221	IL27RA	rs3214904
chr22	37539713	T	C	29	30	0.0264895	2.98492	IL2RB	rs2235330
chr22	37533530	G	C	15	11	0.0369384	2.69584	IL2RB	rs3218292
chr19	55174896	A,AAA,AAAA,AAAAA,AAAAAA,AAAAAAA,AAAAAAAA	-	26	26	0.0339395	2.60825	LILRB4	rs570971228
chr16	3117273	-,T,TG,TGT,TGTG,TGTGTG,TGTGTGTG,TGTGTGTGTG,TGTGTGTGTGTG,TGTGTGTGTGTGTG,TGTGTGTGTGTGTGTGTG,TGTGTGTGTGTGTGTGTGTG	-,GTGTGT,GTGTGTGT,GTGTGTGTGT,GTGTGTGTGTGT,GTGTGTGTGTGTGT	31	33	0.0204756	3.39986	IL32	rs144171852
chr16	3117272	-	G,GTGTG,GTGTGTG,TG,TGTG,TGTGTG,TGTGTGTG,TGTGTGTGTG,TGTGTGTGTGTG,TGTGTGTGTGTGTG,TGTGTGTGTGTGTGTG	6	22	0.0204756	0.294129	IL32	.
chr19	54783521	C	T	29	55	0.000414779	0	LILRB2	rs383925
chr16	70680850	C	G	26	21	0.00307591	3.76797	IL34	rs3813905
chr6	32629963	C	T	8	24	0.0439186	0.360302	HLA-DQB1	rs1049100
chr7	22768572	C	G	5	18	0.0495237	0.324951	IL6	rs2069840
chr19	54784130	T	C	29	55	0.000414779	0	LILRB2	rs383369
chr1	154401972	T	C	25	48	0.0343707	0.308046	IL6R	rs6694817
chr1	154420778	T	C	19	43	0.0119632	0.298852	IL6R	rs7529229
chr1	154407713	T	C	19	42	0.023616	0.331011	IL6R	rs7521458
chr1	154407419	A	C	19	42	0.023616	0.331011	IL6R	rs7518199
chr19	54782919	C	T	29	55	0.000414779	0	LILRB2	rs386056
chr17	20363552	C	A	15	0	1.42929e-07	Inf	LGALS9B	rs201278698
chr16	30532728	A	-	0	10	0.00505351	0	ITGAL	rs879311939
chr16	30532727	-	A	1	11	0.0239667	0.113083	ITGAL	rs917800377
chr6	32629064	A	T	9	2	0.00603521	8.3196	HLA-DQB1	rs9273584
chr12	10586946	C	T	30	27	0.00221973	4.37196	KLRC2	rs113946028
chr12	10586956	C	G	37	46	0.00990641	Inf	KLRC2	rs72475445
chr12	10571808	A	G	28	17	4.00744e-05	6.78834	KLRC3	rs60777328
chr12	9752578	AA,AAA	-	37	39	0.000124791	Inf	KLRB1	.
chr19	55492885	-,T	C	2	15	0.0120096	0.155007	NLRP2	rs531751775
chr6	32634313	C	G	8	24	0.0439186	0.360302	HLA-DQB1	rs1049059
chr12	10573211	A	G	5	0	0.00886382	Inf	KLRC3	rs10734829
chr12	6883670	G	C	31	32	0.0118502	3.66234	LAG3	rs2365094
chr6	31324077	C	G,T	13	2	8.6017e-05	13.9274	HLA-B	rs709053
chrX	117910504	-	T,TT,TTT	33	38	0.0409853	3.64278	IL13RA1	rs5903529
chr17	20354704	T	C	1	9	0.0456314	0.144264	LGALS9B	rs1682192
chr21	46310008	G	A	4	0	0.0236368	Inf	ITGB2	rs2230530
chr19	51920434	G	A	6	1	0.0157705	10.209	SIGLEC10	rs145769059
chr19	54778822	G	A	6	42	1.16569e-08	0.0623619	LILRB2	rs370554702
chr19	55175108	-	AGTTCTGGGTGGGGAGGAGACAGT	3	17	0.0101996	0.200346	LILRB4	.
chr19	51920617	C	T	6	1	0.0157705	10.209	SIGLEC10	rs75355870
chr1	158226466	A,AA	-	17	46	0.000210353	0.170095	CD1A	rs34315183
chr11	280221	A	C	12	32	0.0196547	0.349141	NLRP6	rs6421985
chr4	38776070	C	T	20	16	0.0185108	2.83299	TLR10	rs11466655
chr4	38774889	T	C	13	41	0.000228926	0.188863	TLR10	rs4129009
chr19	54783077	C	G	8	1	0.00258743	14.5008	LILRB2	rs7250635
chr6	32632820	C	G	11	0	1.59062e-05	Inf	HLA-DQB1	rs1130375
chr19	54781554	C	T	30	55	0.00117521	0	LILRB2	rs451000
chr19	54781557	T	C	30	55	0.00117521	0	LILRB2	rs400942
chr19	54782710	A	G	8	1	0.00258743	14.5008	LILRB2	rs7247208
chr19	54782589	T	C	19	10	0.00122606	4.66045	LILRB2	rs586206
chr19	54781466	C	G	18	10	0.00262005	4.18879	LILRB2	rs3859538
chr19	54781509	C	T	18	10	0.00262005	4.18879	LILRB2	rs1808548
chr19	54781843	C	T	18	10	0.00262005	4.18879	LILRB2	rs4022330
chr6	32609173	C	G	7	22	0.0405596	0.353926	HLA-DQA1	rs10093
chr19	55492877	-	CCCCCCCC,CCCCCCCCCC,CCCCCCCCCCC,CCCCCCCCCCCCC,CCCCCCCCCCCCCCC,CCCCCCCCCCCCCCCC,CCCCCCCCCCCCCCCCCCCCC,CCCCCCCCCCCCCCCCCCCCCCCCCCCCCC,CCCCCCCCCCCCCCCCCCCCCCCCCCCCCCCC,TCCC	0	12	0.00134391	0	NLRP2	.
chr17	20370735	T	C	29	23	0.000603058	4.95063	LGALS9B	rs4985833
chr15	81584389	C	T	30	18	5.74021e-06	8.57512	IL16	rs4072680
chr6	32632598	A	T	9	25	0.0487947	0.389718	HLA-DQB1	rs17412833
chr19	55175058	C	A	26	50	0.0224508	0.240366	LILRB4	rs201511126
chr17	7462555	G	A	20	44	0.0110696	0.298393	TNFSF13	rs11552708
chr19	55178327	G	A	13	9	0.0481552	2.73615	LILRB4	rs11574578
chr9	113637854	G	A	7	23	0.0248591	0.328557	LPAR1	rs3739709
chr19	35803357	G	A	10	4	0.016051	4.63842	MAG	rs111888486
chr1	78998049	-	TA,TATA,TATATA,TATATATA,TATATATATA	16	4	6.3969e-05	9.44353	PTGFR	.
chr16	3071298	G	A	4	0	0.0236368	Inf	TNFRSF12A	rs2232797
chr16	57095729	C	T	17	38	0.0318126	0.384491	NLRC5	rs3751711
chr16	57111364	G	C	21	43	0.0380453	0.370554	NLRC5	rs34702866
chr16	57098982	T	C	13	8	0.0252391	3.13986	NLRC5	rs55703352
chr16	57099321	T	C	13	9	0.0481552	2.73615	NLRC5	rs56269236
chr11	7981131	T	-	7	27	0.00411086	0.245772	NLRP10	rs148579969
chr19	56300069	G	A	8	3	0.0248787	4.69768	NLRP11	rs145571469
chr19	56300107	-	A,AA,AAA,AAAA,AAAAA,AAAAAAA	9	4	0.0316314	4.03221	NLRP11	.
chr19	56329187	A,AA	-	30	33	0.0405596	2.82545	NLRP11	.
chr19	56329186	-	A,GA,GAA	4	18	0.0236361	0.252657	NLRP11	rs10632108
chr19	56443519	C	T	26	23	0.0103799	3.24433	NLRP13	rs12610617
chr19	45162189	C	A	13	36	0.00566506	0.290068	PVR	rs35385129
chr11	7060237	G	-	36	44	0.0239667	8.84304	NLRP14	rs11288450
chr1	154426970	A	C	19	43	0.0119632	0.298852	IL6R	rs2228145
chr16	3594163	A	-	37	48	0.0389343	Inf	NLRC3	rs60164526
chr6	29913078	A	G	12	3	0.00100945	8.11795	HLA-A	rs41546815
chr19	55488343	C	-	25	14	9.04434e-05	5.9642	NLRP2	rs367729931
chr19	54778707	T	G	12	45	2.54088e-06	0.109959	LILRB2	rs57307400
chr16	3071122	G	A	4	0	0.0236368	Inf	TNFRSF12A	rs2232796
chr19	55481669	T	C	19	42	0.023616	0.331011	NLRP2	rs269913
chr19	55485786	G	A	17	39	0.0185108	0.352984	NLRP2	rs703468
chr19	55485899	G	A	17	39	0.0185108	0.352984	NLRP2	rs2217659
chr19	55481320	G	C	17	39	0.0185108	0.352984	NLRP2	rs703465
chr19	55488150	T	C	17	39	0.0185108	0.352984	NLRP2	rs8102561
chr19	55501242	C	A	8	3	0.0248787	4.69768	NLRP2	rs140343566
chr19	55501243	C	A	8	3	0.0248787	4.69768	NLRP2	rs182331589
chr1	247597193	TCAGATGTGTTCTGATGCTTTCTCTATTCCGGAGCTCTCTGGTCAGGTGTGTTCTGATGCTTTCTGTATTCCGGAGCTCTCTGA	-	2	14	0.0130174	0.170093	NLRP3	.
chr1	247597364	-	AT	23	20	0.0194925	2.84058	NLRP3	rs772851137
chr1	247588960	G	A	4	17	0.0409853	0.274516	NLRP3	rs3738447
chr11	284257	G	A	16	12	0.0380453	2.69866	NLRP6	rs11246050
chr11	284093	A	G	14	37	0.00980039	0.300346	NLRP6	rs9734280
chr11	280673	C	T	10	28	0.0308037	0.361217	NLRP6	rs12807092
chr11	279214	G	C	0	8	0.0195789	0	NLRP6	rs760058
chr19	55452749	-	A,AA,AAA	11	4	0.00791888	5.28964	NLRP7	rs55704982
chr19	55458694	-	A	0	11	0.00259834	0	NLRP7	rs55672265
chr19	55439168	C	G	14	9	0.0271868	3.07022	NLRP7	rs775870
chr19	56473559	C	T	1	9	0.0456314	0.144264	NLRP8	rs111772035
chr6	32489856	C	A,T	21	17	0.017873	2.89763	HLA-DRB5	rs707956
chr6	29910834	G	C	18	15	0.0468497	2.49966	HLA-A	rs281864745
chr3	112188478	-	CATAGAATATGTATATAC,GTACATAGAATATGTATATAC,TAC,TAGTACATAGAATATGTATATAC,TATAGTACATAGAATATGTATATAC	31	23	7.838e-05	7.02678	BTLA	.
chr6	154360508	G	T	13	8	0.0252391	3.13986	OPRM1	rs6912029
chr6	154361048	C	T	13	8	0.0252391	3.13986	OPRM1	rs12209447
chr12	10571830	T	C	27	14	1.26056e-05	7.69805	KLRC3	rs60351539
chr19	56220430	-	T	8	30	0.00233948	0.233715	NLRP9	rs771117253
chr19	56228399	-	T	20	8	7.71006e-05	6.7431	NLRP9	.
chr19	45160896	T	C	17	45	0.000555265	0.192829	PVR	rs10410651
chr6	32489853	A	C	23	19	0.0111096	3.07237	HLA-DRB5	rs1059580
chr19	45147340	G	T	14	36	0.0111096	0.325481	PVR	rs11540084
chr6	32634302	A,AG	-,G	8	24	0.0439186	0.360302	HLA-DQB1	rs1049062
chr19	45164732	T	G	4	17	0.0409853	0.274516	PVR	rs2272021
chr19	45150433	G	A	4	16	0.0423909	0.29909	PVR	rs2272020
chr4	38776107	T	G	23	51	0.000424406	0.132077	TLR10	rs11096955
chr19	51630482	C	A	25	48	0.0343707	0.308046	SIGLEC9	rs2258983
chr19	51628529	A	G	25	48	0.0343707	0.308046	SIGLEC9	rs2075803
chr6	150343211	A	G	1	16	0.000953359	0.0691684	RAET1L	rs912565
chr19	52148617	A	G	5	18	0.0495237	0.324951	SIGLEC14	rs4544342
chr19	52148918	C	G	5	18	0.0495237	0.324951	SIGLEC14	rs1868952
chr19	52148804	A	C	5	18	0.0495237	0.324951	SIGLEC14	rs885266
chr19	52148980	-	A	22	44	0.0369384	0.370942	SIGLEC14	rs769894907
chr19	52148981	-,C	A,ACA,ACACA,ACACACA,ACACACACA,ACACACACACA,ACACACACACACA,ACACACACACACACA	22	44	0.0369384	0.370942	SIGLEC14	.
chr19	55178162	A	G	26	49	0.0295938	0.293618	LILRB4	rs11574576
chr12	123200158	G	C	4	0	0.0236368	Inf	HCAR3	rs470535
chr19	51631363	C	T	25	48	0.0343707	0.308046	SIGLEC9	rs273691
chr19	51632145	T	-,G	25	48	0.0343707	0.308046	SIGLEC9	rs273692
chr3	151598526	C	T	6	0	0.00326025	Inf	SUCNR1	rs79888638
chr4	38799710	T	C	27	53	0.00276957	0.104488	TLR1	rs4833095
chr3	114026673	A	G	7	2	0.0275049	6.06074	TIGIT	rs11714612
chr3	114027065	-	GTGT	7	2	0.0275049	6.06074	TIGIT	rs35641088
chr21	34793638	-	A,AA,AAAA	36	17	1.85449e-11	76.4555	IFNGR2	rs11458804
chr4	38798935	C	T	27	52	0.00535866	0.159115	TLR1	rs5743614
chr16	30492668	A	-	26	9	2.28431e-07	11.6594	ITGAL	.
chr4	38774785	A	G	20	48	0.000587012	0.175331	TLR10	rs10776482
chr4	38775040	A	G	20	48	0.000587012	0.175331	TLR10	rs10776483
chr4	38776180	C	A	20	48	0.000587012	0.175331	TLR10	rs11096956
chr12	10573145	C	T	4	0	0.0236368	Inf	KLRC3	rs2682489
chr6	32610461	A	G	12	33	0.0113966	0.324177	HLA-DQA1	rs9260
chr19	4292961	-	T	3	25	0.000151675	0.108309	TMIGD2	.
chr1	12252341	-	TG,TGTG	1	9	0.0456314	0.144264	TNFRSF1B	.
chr1	1147985	-	AGCCCCTCCCAGCCCCTGGCCCCTCTGCCCCCTCA,CAGCCCCTCCCAGCCCCTGGCCCCTCTGCCCCCTCA	4	16	0.0423909	0.29909	TNFRSF4	.
chr12	10571716	A	T	16	0	4.08369e-08	Inf	KLRC3	rs2682511
chr13	108959366	AAAAAAAAAAAAA	-	9	4	0.0316314	4.03221	TNFSF13B	.
chr6	32629087	A	G	9	3	0.0117648	5.46362	HLA-DQB1	rs117626117
chr16	3119020	A	G	18	0	3.00904e-09	Inf	IL32	rs371244098
chr6	32629210	C	T	9	4	0.0316314	4.03221	HLA-DQB1	rs1130429
chr6	32629074	G	A	9	3	0.0117648	5.46362	HLA-DQB1	rs9273588
chr19	55175016	A	G	5	35	1.58386e-06	0.0919649	LILRB4	rs765685566

## Sheet: ST2
Chr	Start	Ref	Alt	Validate.ASD	Validate.HC	Validate.fisher.p	Validate.fisher.or	Gene.refGene	avsnp150
chr19	54782407	C	T	7	2	0.0270809	6.11774	LILRB2	rs1128646
chr19	54782420	G	A	7	2	0.0270809	6.11774	LILRB2	rs11666104
chr6	29911115	-,G	AA,C	7	2	0.0270809	6.11774	HLA-A	rs757622018
chr6	150209805	-	A,AA,AAA,AAAA,AAAAA	33	36	0.0059876	7.19286	RAET1E	rs765094508
chr6	31324488	-	GG,GGAG	13	8	0.0241292	3.20293	HLA-B	rs375356947
chr17	20361493	T	C	7	1	0.00638693	12.4099	LGALS9B	rs201762600
chr6	32629931	C	G	8	1	0.00252374	14.6815	HLA-DQB1	rs41542812
chr6	32632688	T	A,C	12	7	0.0330849	3.30427	HLA-DQB1	rs1071637
chr12	9750669	A	G	32	35	0.00962763	5.09393	KLRB1	rs1135816
chr6	31324641	T	A	4	0	0.0235231	Inf	HLA-B	rs1050518
chr6	29911114	G	A,T	7	2	0.0270809	6.11774	HLA-A	rs3173420
chr6	31324547	G	C	4	0	0.0235231	Inf	HLA-B	rs1065386
chr6	31324549	T	C	4	0	0.0235231	Inf	HLA-B	rs1050570
chr21	34634878	G	A	27	23	0.00374982	4.18241	IFNAR2	rs1131668
chr6	32629161	A	G	6	1	0.0155953	10.2902	HLA-DQB1	rs1130430
chr19	35850264	G	A	5	1	0.036643	8.30434	FFAR3	rs76995702
chr12	10588581	T	C	6	29	0.000344852	0.167682	KLRC2	rs28403159
chr21	45649666	G	A	2	12	0.0382524	0.205206	ICOSLG	rs4511811
chr2	102793533	C	G	17	13	0.0376066	2.79739	IL1R1	rs3917324
chr2	228680154	T	-	9	38	2.18547e-05	0.131135	CCL20	rs34834265
chr17	38712160	-	T	3	28	1.02574e-05	0.0826999	CCR7	rs372297045
chr3	112188476	-	G,GTACATAGAATATG,GTACATAGAATATGTATATAC,TAGTACATAGAATATGTATATAC,TATAGTACATAGAATATGTATATAC	16	8	0.00303272	4.54113	BTLA	rs71631392
chr3	112218320	A,AA	-	7	2	0.0270809	6.11774	BTLA	.
chr1	207014472	A	C	23	21	0.0287298	2.79453	IL19	rs2243188
chr6	32632689	C	T	8	1	0.00252374	14.6815	HLA-DQB1	rs41552812
chr6	137330733	TTTTT,TTTTTT,TTTTTTT	-	7	1	0.00638693	12.4099	IL20RA	.
chr6	32629603	T	C	1	11	0.0233803	0.111712	HLA-DQB1	rs9273852
chr1	158224576	TG,TGTG,TGTGTG,TGTGTGTG,TGTGTGTGTG,TGTGTGTGTGTG,TGTGTGTGTGTGTGTGTG	-	35	43	0.00969659	Inf	CD1A	.
chr6	31324491	C	A	4	0	0.0235231	Inf	HLA-B	rs3180379
chr1	158324425	A	G	34	39	0.00636025	11.1033	CD1E	rs1065457
chr19	35837327	C	T	7	23	0.0229109	0.319385	CD22	rs58156121
chr19	35836600	C	A	4	21	0.00374302	0.193931	CD22	rs34826052
chr19	55501349	A,AA	-	13	37	0.00210039	0.243921	NLRP2	rs202147826
chr18	67613944	-	A	10	41	5.31651e-06	0.110797	CD226	rs397966834
chr20	44756944	-,T,TT	-,T,TT	14	33	0.0478296	0.388266	CD40	rs749773841
chr3	111263826	G	A	6	0	0.0032143	Inf	CD96	rs1513325
chr16	10995850	G	T	32	36	0.0171063	4.66547	CIITA	rs6498124
chr5	149440645	C	T	24	23	0.0300942	2.71832	CSF1R	rs77510451
chr5	149435759	G	A	30	33	0.0283237	3.40792	CSF1R	rs216136
chr5	134907432	-	TTTT,TTTTT,TTTTTTTTTT,TTTTTTTTTTTTTTTTTTTTTTT	4	0	0.0235231	Inf	CXCL14	.
chr4	74864373	A	G	4	0	0.0235231	Inf	CXCL5	rs373132144
chr20	44756943	-	T,TT,TTT	13	9	0.0462857	2.7876	CD40	rs749590513
chr1	172628781	-	T	5	19	0.0283237	0.293434	FASLG	.
chr19	35843086	G	A	30	51	0.036643	0.120419	FFAR1	rs2301151
chr19	35850560	G	A	5	1	0.036643	8.30434	FFAR3	rs375946
chr6	31324489	-,C	A,G,GCGGT	6	0	0.0032143	Inf	HLA-B	rs3180380
chr14	105518456	A	C	8	27	0.00791647	0.278544	GPR132	rs3803321
chr3	98250862	C	A	4	18	0.0223965	0.247437	GPR15	rs3749260
chr5	156469783	G	A	12	7	0.0330849	3.30427	HAVCR1	rs2270926
chr5	156469808	C	T	5	21	0.00969214	0.24988	HAVCR1	rs13173581
chr5	156479426	T	C	5	21	0.00969214	0.24988	HAVCR1	rs12522248
chr5	156464242	T	C	4	18	0.0223965	0.247437	HAVCR1	rs2036402
chr5	156459856	C	T	4	18	0.0223965	0.247437	HAVCR1	rs34670839
chr19	52149165	G	A	8	2	0.0127185	7.23627	SIGLEC14	rs4802834
chr5	156525921	AG	-	21	42	0.0497432	0.361673	HAVCR2	rs371359315
chr1	207040659	G	A	23	19	0.00925717	3.28059	IL20	rs2232360
chr6	29913191	T	C	8	1	0.00252374	14.6815	HLA-A	rs2975055
chr6	29913171	G	A	8	1	0.00252374	14.6815	HLA-A	rs2975057
chr6	29913204	G	C	9	2	0.00585578	8.43798	HLA-A	rs115210534
chr6	29910923	C	A	7	1	0.00638693	12.4099	HLA-A	rs9260147
chr6	29910980	C	T	7	1	0.00638693	12.4099	HLA-A	rs41552627
chr6	29910604	C	A	7	1	0.00638693	12.4099	HLA-A	rs12721675
chr6	31323960	G	C	5	0	0.00878574	Inf	HLA-B	rs1131275
chr6	31324711	A	G	4	0	0.0235231	Inf	HLA-B	rs2596492
chr6	31324506	C	T	7	1	0.00638693	12.4099	HLA-B	rs1050388
chr6	31323958	T	G	4	0	0.0235231	Inf	HLA-B	rs1131279
chr6	31324100	G	T	4	0	0.0235231	Inf	HLA-B	rs1050654
chr6	31324497	T	G	4	0	0.0235231	Inf	HLA-B	rs1131223
chr6	31324536	T	C	4	0	0.0235231	Inf	HLA-B	rs1071816
chr6	31324643	G	C	12	7	0.0330849	3.30427	HLA-B	rs1050517
chr6	31322470	C	G	19	14	0.0134053	3.17685	HLA-B	rs2442717
chr6	32629053	C	A	4	0	0.0235231	Inf	HLA-DQB1	rs9273580
chr6	31324530	G	C	5	0	0.00878574	Inf	HLA-B	rs41546313
chr6	31324154	G	A	5	0	0.00878574	Inf	HLA-B	rs1050379
chr1	71440217	C	T	28	27	0.0120642	3.6482	PTGER3	rs2072947
chr19	56424689	G	T	0	7	0.0384904	0	NLRP13	rs1865956
chr6	31324528	G	T	4	0	0.0235231	Inf	HLA-B	rs1071817
chr6	29913215	T	-	9	2	0.00585578	8.43798	HLA-A	rs371897318
chr6	32628996	C	A	9	3	0.0114608	5.53663	HLA-DQB1	rs9273560
chr4	123374820	T	-	0	13	0.00120508	0	IL2	rs368686382
chr6	32629284	C	A	8	1	0.00252374	14.6815	HLA-DQB1	rs114262759
chr6	32632520	A	G	8	1	0.00252374	14.6815	HLA-DQB1	rs281862157
chr6	32628992	C	T	9	4	0.0309095	4.08204	HLA-DQB1	rs117656997
chr9	34662445	A	G	1	9	0.0449044	0.142944	CCL27	rs79015346
chr6	32632957	C	A,T	22	20	0.0304768	2.67563	HLA-DQB1	rs9274418
chr6	32628776	C	A	0	8	0.0192655	0	HLA-DQB1	rs2854273
chr6	32632915	C	A	13	9	0.0462857	2.7876	HLA-DQB1	rs74188963
chr6	32634152	G	A	23	22	0.0484776	2.58408	HLA-DQB1	rs9274507
chr6	32632474	T	G	23	22	0.0484776	2.58408	HLA-DQB1	rs9274360
chr6	32634508	C	T	20	18	0.0483763	2.49078	HLA-DQB1	rs9274528
chr6	32629708	-	G	24	24	0.0492046	2.51774	HLA-DQB1	rs33980016
chr6	32551797	CA,CACA	-	6	1	0.0155953	10.2902	HLA-DRB1	.
chr6	32629193	C	T	5	1	0.036643	8.30434	HLA-DQB1	rs1049163
chr6	32546795	T	A	5	0	0.00878574	Inf	HLA-DRB1	rs1064701
chr1	71440052	T	C	0	7	0.0384904	0	PTGER3	rs13306014
chr16	10996577	C	T	5	0	0.00878574	Inf	CIITA	rs147472574
chr21	45650008	-	C	28	30	0.0379388	2.89782	ICOSLG	rs145424134
chr9	21409037	A	-	20	11	0.00118721	4.86705	IFNA8	rs28751295
chr21	34634808	C	T	0	7	0.0384904	0	IFNAR2	rs6517157
chr1	207015957	T	C	24	18	0.00233193	4.04909	IL19	rs2243191
chr19	39789115	A	G	0	12	0.0012906	0	IFNL1	rs30461
chr19	39760191	A	G	0	7	0.0384904	0	IFNL2	rs8103362
chr19	39734220	C	A	0	9	0.00969659	0	IFNL3	rs4803217
chr19	39734923	A	G	0	9	0.00969659	0	IFNL3	rs11881222
chr19	39735106	T	C	0	9	0.00969659	0	IFNL3	rs8103142
chr19	39735644	C	G	0	9	0.00969659	0	IFNL3	rs28416813
chr19	18170265	-	C	12	7	0.0330849	3.30427	IL12RB1	rs3833286
chr11	7060977	A	T	6	0	0.0032143	Inf	NLRP14	rs76274604
chr2	113672908	A	G	5	1	0.036643	8.30434	IL37	rs144486419
chr19	54781541	C	T	31	52	0.0235231	0	LILRB2	rs450937
chr22	17581224	C	T	15	11	0.0349834	2.7607	IL17RA	rs41513146
chr2	103001590	C	A	5	1	0.036643	8.30434	IL18R1	rs56151680
chr2	103003265	C	A	21	17	0.0156416	3.04601	IL18R1	rs2241116
chr2	102979028	C	T	26	27	0.0450279	2.64467	IL18R1	rs2287037
chr2	102984279	T	C	26	27	0.0450279	2.64467	IL18R1	rs1420098
chr2	102984671	T	A	26	27	0.0450279	2.64467	IL18R1	rs1882348
chr2	103040945	G	A	26	27	0.0450279	2.64467	IL18RAP	rs887972
chr2	103068787	G	A	32	37	0.0300636	4.25968	IL18RAP	rs7559479
chr1	78998059	-	TA,TATA,TATATA,TATATATA	6	0	0.0032143	Inf	PTGFR	.
chr6	29911119	G	C,T	7	2	0.0270809	6.11774	HLA-A	rs3173419
chr2	102782433	T	A	31	34	0.0223965	4.04144	IL1R1	rs997049
chr6	29911112	CC	-	7	1	0.00638693	12.4099	HLA-A	rs757867739
chr2	102957629	-,T	-,T	1	9	0.0449044	0.142944	IL1RL1	rs112164401
chr6	150266740	A	G	2	15	0.011472	0.152276	ULBP2	rs62439758
chr3	112218319	-	A,AA,AAA	13	4	0.00169825	6.91761	BTLA	rs569210512
chr5	55252985	A	-	7	32	0.000163522	0.159911	IL6ST	rs879037844
chr18	67563417	-	T,TT,TTT,TTTT	33	31	0.000357016	10.9115	CD226	rs33943534
chr6	137482982	C	T	15	9	0.0138566	3.5266	IL22RA2	rs11154915
chr19	14143447	A,AA,AAA,AAAA	-	7	1	0.00638693	12.4099	IL27RA	.
chr19	14161547	A	G	1	15	0.00171453	0.0741733	IL27RA	rs10424865
chr19	14143096	-	C	3	17	0.00962763	0.196312	IL27RA	rs113266285
chr19	14142705	C	T	3	16	0.0171063	0.214341	IL27RA	rs113593439
chr19	14157478	C	T	1	12	0.012229	0.0999883	IL27RA	rs75452068
chr19	14150303	C	T	3	17	0.00962763	0.196312	IL27RA	rs75852614
chr10	6066417	C	A	4	0	0.0235231	Inf	IL2RA	rs12722576
chr22	37532207	C	T	2	13	0.0219473	0.184861	IL2RB	rs3218299
chr19	55174896	A,AAA,AAAA,AAAAA,AAAAAA,AAAAAAA,AAAAAAAA	-	31	23	3.35228e-05	9.51142	LILRB4	rs570971228
chr19	54783521	C	T	31	52	0.0235231	0	LILRB2	rs383925
chr3	3144519	A	G	1	10	0.0442001	0.125772	IL5RA	rs13097407
chr19	54784130	T	C	31	52	0.0235231	0	LILRB2	rs383369
chr19	54782919	C	T	31	52	0.0235231	0	LILRB2	rs386056
chr8	79659182	T	A	20	14	0.00695459	3.56164	IL7	rs16906062
chr17	20363552	C	A	10	1	0.000355767	19.7509	LGALS9B	rs201278698
chr16	30516492	A	G	30	51	0.036643	0.120419	ITGAL	rs2073917
chr16	30510571	C	T	23	45	0.0330849	0.302638	ITGAL	rs1557672
chr21	46306161	C	T	3	16	0.0171063	0.214341	ITGB2	rs684
chr21	46306472	C	G	3	16	0.0171063	0.214341	ITGB2	rs235375
chr21	46328099	T	C	34	42	0.0442001	7.9509	ITGB2	rs760462
chr6	32629064	A	T	8	0	0.000402779	Inf	HLA-DQB1	rs9273584
chr12	9747744	-	A	32	35	0.00962763	5.09393	KLRB1	rs3214342
chr12	10601690	C	T	13	9	0.0462857	2.7876	KLRC1	rs7301582
chr12	10571808	A	G	21	18	0.0278325	2.79785	KLRC3	rs60777328
chr12	9752578	AA,AAA	-	34	41	0.0233803	8.9516	KLRB1	.
chr19	55492885	-,T	C	0	16	0.000114921	0	NLRP2	rs531751775
chr12	10460543	A	T	31	35	0.0392907	3.71138	KLRD1	rs2302489
chr12	10464017	T	A	19	14	0.0134053	3.17685	KLRD1	rs17206564
chr6	31324077	C	G,T	8	2	0.0127185	7.23627	HLA-B	rs709053
chrX	117910504	-	T,TT,TTT	33	27	1.51865e-05	14.8552	IL13RA1	rs5903529
chr19	54778822	G	A	3	28	1.02574e-05	0.0826999	LILRB2	rs370554702
chr19	55175108	-	AGTTCTGGGTGGGGAGGAGACAGT	3	17	0.00962763	0.196312	LILRB4	.
chr1	158226466	A,AA	-	16	41	0.00250301	0.230284	CD1A	rs34315183
chr19	55492877	-	CCCCCCCC,CCCCCCCCCC,CCCCCCCCCCC,CCCCCCCCCCCCC,CCCCCCCCCCCCCCC,CCCCCCCCCCCCCCCC,CCCCCCCCCCCCCCCCCCCCC,CCCCCCCCCCCCCCCCCCCCCCCCCCCCCC,CCCCCCCCCCCCCCCCCCCCCCCCCCCCCCCC,TCCC	0	13	0.00120508	0	NLRP2	.
chr19	54780457	A	G	8	3	0.0244288	4.74874	LILRB2	rs75008289
chr17	20370735	T	C	26	18	0.000414019	5.3411	LGALS9B	rs4985833
chr15	81584389	C	T	26	25	0.0257139	3.07872	IL16	rs4072680
chr19	55174895	-,C	A,AAA,AAAA,AAAAA,AAAAAA,AAAAAAA,AAAAAAAA,AAAAAAAAA	0	10	0.00491787	0	LILRB4	.
chr19	55176786	C	T	5	20	0.0166747	0.270575	LILRB4	rs1749316
chr19	55176702	A	C	7	22	0.0379388	0.345087	LILRB4	rs1631746
chr16	3593533	T	C	4	0	0.0235231	Inf	NLRC3	rs145345559
chr4	74864344	-	TGGAGGAGCGGAGAT	4	0	0.0235231	Inf	CXCL5	rs575195054
chr4	187454972	T	C	7	0	0.0011508	Inf	MTNR1A	rs8192550
chr4	187454951	T	C	7	0	0.0011508	Inf	MTNR1A	rs8192551
chr1	78998049	-	TA,TATA,TATATA,TATATATA,TATATATATA	16	6	0.00078168	6.30061	PTGFR	.
chr16	57111232	C	T	4	20	0.00688284	0.209992	NLRC5	rs11864231
chr16	57095843	AAAG	-	21	16	0.00852473	3.3246	NLRC5	rs142124514
chr16	57101340	T	C	4	17	0.0392907	0.269442	NLRC5	rs7190199
chr16	57101373	A	G	4	17	0.0392907	0.269442	NLRC5	rs7185320
chr16	57101552	G	A	4	17	0.0392907	0.269442	NLRC5	rs72775180
chr19	56307679	-	A,AA	28	25	0.00351429	4.24651	NLRP11	rs35540760
chr19	56307680	-,A,AA	-,A	7	27	0.00351429	0.235487	NLRP11	rs879195405
chr19	54304349	A	-	10	37	0.000155624	0.166084	NLRP12	rs35326804
chr19	56410222	C	T	17	38	0.0247867	0.352465	NLRP13	rs302827
chr16	3594163	A	-	35	43	0.00969659	Inf	NLRC3	rs60164526
chr6	29913078	A	G	17	4	2.01384e-05	10.9685	HLA-A	rs41546815
chr19	54778707	T	G	9	31	0.00224251	0.238669	LILRB2	rs57307400
chr1	247597193	TCAGATGTGTTCTGATGCTTTCTCTATTCCGGAGCTCTCTGGTCAGGTGTGTTCTGATGCTTTCTGTATTCCGGAGCTCTCTGA	-	2	16	0.0059876	0.139027	NLRP3	.
chr1	247611571	T,TT,TTT,TTTT,TTTTT	-	14	10	0.0497432	2.76493	NLRP3	rs773761483
chr1	247608167	C	A	10	5	0.0400731	3.69927	NLRP3	rs45624634
chr19	56392875	T	G	9	26	0.0275178	0.350448	NLRP4	rs302456
chr19	56527313	C	T	7	2	0.0270809	6.11774	NLRP5	rs12610241
chr6	29910834	G	C	27	7	3.59582e-09	20.5877	HLA-A	rs281864745
chr3	112188478	-	CATAGAATATGTATATAC,GTACATAGAATATGTATATAC,TAC,TAGTACATAGAATATGTATATAC,TATAGTACATAGAATATGTATATAC	31	25	9.46802e-05	8.16805	BTLA	.
chr19	56220245	C	G	18	13	0.0216068	3.13137	NLRP9	rs2287832
chr19	56220444	T	G	18	13	0.0216068	3.13137	NLRP9	rs2287831
chr17	6371780	T	A	1	10	0.0442001	0.125772	PITPNM3	rs34536093
chr12	10571830	T	C	28	21	0.000361272	5.77726	KLRC3	rs60351539
chr19	56220430	-	T	7	27	0.00351429	0.235487	NLRP9	rs771117253
chr19	56228399	-	T	19	13	0.00697421	3.5061	NLRP9	.
chr6	150239330	C	T	32	35	0.00962763	5.09393	RAET1G	rs17079029
chr6	150240829	G	C	32	35	0.00962763	5.09393	RAET1G	rs9397449
chr6	150244261	C	A	32	35	0.00962763	5.09393	RAET1G	rs9397451
chr6	150244217	GTCTGAATGCAGCCC	-	32	35	0.00962763	5.09393	RAET1G	rs71656790
chr19	50463982	T	G	23	21	0.0287298	2.79453	SIGLEC11	rs9676436
chr19	50455351	C	T	18	15	0.0434325	2.5814	SIGLEC11	rs10405621
chr19	50462298	G	C	18	15	0.0434325	2.5814	SIGLEC11	rs62113133
chr6	150343211	A	G	1	12	0.012229	0.0999883	RAET1L	rs912565
chr19	52132526	-	AC,ACAC,ACACAC,ACACACAC	1	11	0.0233803	0.111712	SIGLEC5	.
chr19	52132524	-	AC,ACAC,ACACAC,ACACACAC,ACACACACAC,ACACACACACAC	31	36	0.0407849	3.39928	SIGLEC5	rs71187699
chr21	34793638	-	A,AA,AAAA	29	23	0.000344852	5.96366	IFNGR2	rs11458804
chr4	38798515	G	A	8	2	0.0127185	7.23627	TLR1	rs72493538
chr4	38800323	A	G	8	2	0.0127185	7.23627	TLR1	rs76600635
chr16	30492668	A	-	26	8	3.54119e-08	15.2151	ITGAL	.
chr4	187000321	G	T	17	14	0.0438713	2.53441	TLR3	rs1879026
chr8	23049136	-	A,AA	10	38	6.17367e-05	0.151192	TNFRSF10A	rs34127830
chr18	60025458	-	T	13	44	7.63976e-06	0.110906	TNFRSF11A	rs397702236
chr18	60015292	-,A,AA,AAAAAAA,AAAAAAAA,AAAAAAAAA,AAAAAAAAAAA	-,A	32	30	0.000624095	7.65394	TNFRSF11A	rs201661953
chr6	32629112	G	A	8	2	0.0127185	7.23627	HLA-DQB1	rs9273609
chr6	32629111	T	C	8	2	0.0127185	7.23627	HLA-DQB1	rs281864287
chr1	12198297	T	C	29	28	0.00603278	4.07634	TNFRSF8	rs476488
chr6	32629109	C	T	8	1	0.00252374	14.6815	HLA-DQB1	rs281864289
chr13	43148565	T	C	19	40	0.0357262	0.360783	TNFSF11	rs2296533
chr12	10571716	A	T	14	0	4.2893e-07	Inf	KLRC3	rs2682511
chr13	108959365	A,AA,AAA,AAAA,AAAAA,AAAAAA,AAAAAAA,AAAAAAAAAAAAA,AAAAAAAAAAAAAA,AAAAAAAAAAAAAAAA	-	21	19	0.0478296	2.57556	TNFSF13B	rs565521563
chr6	32629087	A	G	8	0	0.000402779	Inf	HLA-DQB1	rs117626117
chr9	117668142	C	T	20	16	0.0164833	2.95998	TNFSF8	rs3181195
chr9	117692251	-	AGAG	4	0	0.0235231	Inf	TNFSF8	rs201162109
chr6	150289707	C	T	26	23	0.00795682	3.58709	ULBP1	rs4870163
chr16	3119020	A	G	18	0	2.35858e-09	Inf	IL32	rs371244098
chr6	32629210	C	T	6	0	0.0032143	Inf	HLA-DQB1	rs1130429
chr6	32629074	G	A	8	0	0.000402779	Inf	HLA-DQB1	rs9273588
chr19	55175016	A	G	6	24	0.00603278	0.245318	LILRB4	rs765685566

## Sheet: ST3
Chr	Start	Ref	Alt	Combine.ASD	Combine.HC	Combine.fisher.fdr	Combine.fisher.or	Gene.refGene	avsnp150
chr6	32629210	C	T	15	4	0.0395439	6.70314	HLA-DQB1	rs1130429
chr6	32629603	T	C	3	25	0.0346089	0.143859	HLA-DQB1	rs9273852
chr19	55501349	A,AA	-	33	79	0.0280511	0.302101	NLRP2	rs202147826
chr16	3594163	A	-	72	91	0.0253653	Inf	NLRC3	rs60164526
chr19	55175108	-	AGTTCTGGGTGGGGAGGAGACAGT	6	34	0.0225715	0.196785	LILRB4	.
chr5	156525921	AG	-	40	88	0.0198807	0.272057	HAVCR2	rs371359315
chr19	52149165	G	A	13	2	0.0197267	11.4236	SIGLEC14	rs4802834
chr1	247597193	TCAGATGTGTTCTGATGCTTTCTCTATTCCGGAGCTCTCTGGTCAGGTGTGTTCTGATGCTTTCTGTATTCCGGAGCTCTCTGA	-	4	30	0.0186978	0.152338	NLRP3	.
chr1	207040659	G	A	47	38	0.0153556	3.38885	IL20	rs2232360
chr21	34634878	G	A	54	49	0.0142785	3.52499	IFNAR2	rs1131668
chr6	32629053	C	A	12	1	0.0111178	20.9008	HLA-DQB1	rs9273580
chr6	150266740	A	G	2	25	0.0104957	0.0946306	ULBP2	rs62439758
chr1	71440217	C	T	59	56	0.00828926	4.10047	PTGER3	rs2072947
chr1	172628781	-	T	6	38	0.00489314	0.166571	FASLG	.
chr6	31324154	G	A	13	1	0.00489314	23.0173	HLA-B	rs1050379
chr6	32629087	A	G	17	3	0.00489314	10.5759	HLA-DQB1	rs117626117
chr6	32629074	G	A	17	3	0.00489314	10.5759	HLA-DQB1	rs9273588
chr19	54782407	C	T	15	2	0.0044841	13.6309	LILRB2	rs1128646
chr19	54782420	G	A	15	2	0.0044841	13.6309	LILRB2	rs11666104
chr6	31324530	G	C	11	0	0.0044841	Inf	HLA-B	rs41546313
chr19	54781541	C	T	61	107	0.0044841	0	LILRB2	rs450937
chr1	78998059	-	TA,TATA,TATATA,TATATATA	11	0	0.0044841	Inf	PTGFR	.
chr6	150343211	A	G	2	28	0.00403062	0.0814478	RAET1L	rs912565
chr3	112218319	-	A,AA,AAA	28	12	0.00367187	4.98769	BTLA	rs569210512
chr19	56220430	-	T	15	57	0.00249292	0.232792	NLRP9	rs771117253
chr18	67563417	-	T,TT,TTT,TTTT	68	73	0.00248194	7.84043	CD226	rs33943534
chr19	55174896	A,AAA,AAAA,AAAAA,AAAAAA,AAAAAAA,AAAAAAAA	-	57	49	0.0023611	4.45908	LILRB4	rs570971228
chr1	207015957	T	C	50	38	0.00214415	4.09146	IL19	rs2243191
chr19	54783521	C	T	60	107	0.00214415	0	LILRB2	rs383925
chr19	54784130	T	C	60	107	0.00214415	0	LILRB2	rs383369
chr19	54782919	C	T	60	107	0.00214415	0	LILRB2	rs386056
chr6	150209805	-	A,AA,AAA,AAAA,AAAAA	70	77	0.00139405	13.4912	RAET1E	rs765094508
chr6	32629064	A	T	17	2	0.00111637	15.9963	HLA-DQB1	rs9273584
chr12	10571808	A	G	49	35	0.00110712	4.34351	KLRC3	rs60777328
chr12	9752578	AA,AAA	-	71	80	0.00110712	23.6993	KLRB1	.
chr19	55492885	-,T	C	2	31	0.000836943	0.0708135	NLRP2	rs531751775
chr6	31324077	C	G,T	21	4	0.000828725	10.4602	HLA-B	rs709053
chrX	117910504	-	T,TT,TTT	66	65	0.000777979	7.03734	IL13RA1	rs5903529
chr19	56228399	-	T	39	21	0.000775243	4.79197	NLRP9	.
chr18	67613944	-	A	23	73	0.000723472	0.22067	CD226	rs397966834
chr5	55252985	A	-	18	66	0.000646599	0.209053	IL6ST	rs879037844
chr1	158226466	A,AA	-	33	87	0.000387461	0.19655	CD1A	rs34315183
chr19	55492877	-	CCCCCCCC,CCCCCCCCCC,CCCCCCCCCCC,CCCCCCCCCCCCC,CCCCCCCCCCCCCCC,CCCCCCCCCCCCCCCC,CCCCCCCCCCCCCCCCCCCCC,CCCCCCCCCCCCCCCCCCCCCCCCCCCCCC,CCCCCCCCCCCCCCCCCCCCCCCCCCCCCCCC,TCCC	0	25	0.000369278	0	NLRP2	.
chr17	20370735	T	C	55	41	0.000320229	5.15599	LGALS9B	rs4985833
chr15	81584389	C	T	56	43	0.000320229	5.15828	IL16	rs4072680
chr1	78998049	-	TA,TATA,TATATA,TATATATA,TATATATATA	32	10	3.94692e-05	7.65932	PTGFR	.
chr6	29913078	A	G	29	7	3.41964e-05	9.49809	HLA-A	rs41546815
chr19	55175016	A	G	11	59	3.41964e-05	0.148348	LILRB4	rs765685566
chr19	54778707	T	G	21	76	3.24534e-05	0.169873	LILRB2	rs57307400
chr4	123374820	T	-	0	31	1.3179e-05	0	IL2	rs368686382
chr6	29910834	G	C	45	22	1.3179e-05	6.36126	HLA-A	rs281864745
chr3	112188478	-	CATAGAATATGTATATAC,GTACATAGAATATGTATATAC,TAC,TAGTACATAGAATATGTATATAC,TATAGTACATAGAATATGTATATAC	62	48	9.82764e-06	7.53122	BTLA	.
chr12	10571830	T	C	55	35	8.84463e-06	6.57742	KLRC3	rs60351539
chr2	228680154	T	-	21	82	3.11189e-07	0.127302	CCL20	rs34834265
chr17	20363552	C	A	25	1	1.37647e-07	55.3021	LGALS9B	rs201278698
chr17	38712160	-	T	5	59	6.36237e-09	0.0616782	CCR7	rs372297045
chr19	54778822	G	A	9	70	8.93486e-10	0.0767414	LILRB2	rs370554702
chr21	34793638	-	A,AA,AAAA	65	40	4.83464e-10	15.2925	IFNGR2	rs11458804
chr16	30492668	A	-	52	17	5.79144e-11	13.4929	ITGAL	.
chr12	10571716	A	T	30	0	5.79144e-11	Inf	KLRC3	rs2682511
chr16	3119020	A	G	36	0	4.54898e-14	Inf	IL32	rs371244098

## Sheet: ST4
Gene	locus	Forward primer	Reverse primer
LILRB2	chr19:54782407	GGGGAAGACTCAGAGAAAAC	TCAGAGAGGACAGGGTCAAG
LILRB2	chr19:54782420	GGGGAAGACTCAGAGAAAAC	TCAGAGAGGACAGGGTCAAG
HLA-DQB1	chr6:32629210	CTTAGGGTCTAAGGTTATGG	GTTCCTCACCTTTCTGACTC
HLA-B	chr6:31324530	CCCACTCCATGAGGTATTTC	TGTAATCCTTGCCGTCGTAG

## Sheet: ST5
SampleID	Group_names	Stage	Sex	Age	HLA-DQB1_p.S229N	HLA-B_p.A93G	LILRB2_p.R322H	LILRB2_c.956-4C_T	variant_counts
A1	ASD	Discovery	M	2	1	0	1	1	1549
A10	ASD	Discovery	M	3	1	1	0	0	1611
A101	ASD	Discovery	F	2	0	0	1	1	1379
A104	ASD	Discovery	M	2	0	0	0	0	1490
A11	ASD	Discovery	M	3	0	0	1	1	1417
A110	ASD	Discovery	F	4	0	0	0	0	1540
A113	ASD	Discovery	M	3	1	0	0	0	1507
A116	ASD	Discovery	F	5	0	0	1	1	1553
A119	ASD	Discovery	M	2	0	0	1	1	1409
A124	ASD	Discovery	M	4	0	0	1	1	1434
A127	ASD	Discovery	M	4	0	0	0	0	1453
A134	ASD	Discovery	M	3	0	0	0	0	1504
A142	ASD	Discovery	F	2	0	0	1	1	1443
A151	ASD	Discovery	M	4	0	0	0	0	1508
A159	ASD	Discovery	M	3	0	0	1	1	1548
A172	ASD	Discovery	M	2	1	0	0	0	1540
A181	ASD	Discovery	M	3	0	0	0	0	1558
A185	ASD	Discovery	M	4	0	0	0	0	1667
A22	ASD	Discovery	M	3	0	0	0	0	1486
A35	ASD	Discovery	F	2	0	1	0	0	1446
A42	ASD	Discovery	M	2	0	0	0	0	1466
A48	ASD	Discovery	M	0	0	0	0	0	1402
A52	ASD	Discovery	M	4	0	0	0	0	1495
A59	ASD	Discovery	M	4	0	0	0	0	1471
A6	ASD	Discovery	M	4	0	0	0	0	1427
A67	ASD	Discovery	M	3	0	1	0	0	1505
A72	ASD	Discovery	M	3	0	1	0	0	1504
A73	ASD	Discovery	M	3	0	0	0	0	1498
A75	ASD	Discovery	M	3	0	0	0	0	1504
A79	ASD	Discovery	M	3	1	0	0	0	1549
A89	ASD	Discovery	F	4	1	0	0	0	1528
Ay004	ASD	Discovery	F	3	1	1	0	0	1644
Ay021	ASD	Discovery	F	3	0	0	0	0	1433
Ay027	ASD	Discovery	F	4	0	0	0	0	1550
Ay028	ASD	Discovery	F	3	0	0	0	0	1501
Ay029	ASD	Discovery	F	6	1	1	0	0	1621
Ay032	ASD	Discovery	F	3	1	0	0	0	1585
H02	Non_ASD	Discovery	F	32	1	0	0	0	1561
H04	Non_ASD	Discovery	F	31	0	0	0	0	1426
H07	Non_ASD	Discovery	F	28	0	0	0	0	1615
H11	Non_ASD	Discovery	F	64	0	0	0	0	1500
H12	Non_ASD	Discovery	F	47	0	0	0	0	1519
H13	Non_ASD	Discovery	F	68	0	0	0	0	1619
H20	Non_ASD	Discovery	F	30	0	0	0	0	1589
H24	Non_ASD	Discovery	F	65	0	0	0	0	1514
H26	Non_ASD	Discovery	F	39	0	0	0	0	1479
H31	Non_ASD	Discovery	F	25	0	0	0	0	1677
H34	Non_ASD	Discovery	F	25	0	0	0	0	1658
H35	Non_ASD	Discovery	F	44	0	0	0	0	1472
H50	Non_ASD	Discovery	F	27	0	0	0	0	1465
H54	Non_ASD	Discovery	F	31	0	0	0	0	1487
SH02	Non_ASD	Discovery	F	49	0	0	0	0	1598
SH10	Non_ASD	Discovery	F	35	1	0	0	0	1650
SH11	Non_ASD	Discovery	F	48	0	0	0	0	1582
SH19	Non_ASD	Discovery	F	58	0	0	0	0	1354
SH20	Non_ASD	Discovery	F	33	0	0	0	0	1602
SH24	Non_ASD	Discovery	F	36	0	0	0	0	1582
SH34	Non_ASD	Discovery	F	46	0	0	0	0	1440
SH40	Non_ASD	Discovery	F	44	0	0	0	0	1473
SH45	Non_ASD	Discovery	F	24	0	0	0	0	1440
SH47	Non_ASD	Discovery	F	45	0	0	0	0	1598
H01	Non_ASD	Discovery	M	58	0	0	0	0	1547
H08	Non_ASD	Discovery	M	29	0	0	0	0	1523
H14	Non_ASD	Discovery	M	29	0	0	0	0	1623
H16	Non_ASD	Discovery	M	37	0	0	0	0	1577
H33	Non_ASD	Discovery	M	30	0	0	0	0	1458
H42	Non_ASD	Discovery	M	24	0	0	0	0	1600
H45	Non_ASD	Discovery	M	33	0	0	0	0	1502
H46	Non_ASD	Discovery	M	42	0	0	0	0	1424
H49	Non_ASD	Discovery	M	29	0	0	0	0	1452
SH01	Non_ASD	Discovery	M	47	0	0	0	0	1450
SH07	Non_ASD	Discovery	M	76	0	0	0	0	1558
SH12	Non_ASD	Discovery	M	40	0	0	0	0	1458
SH14	Non_ASD	Discovery	M	53	0	0	0	0	1579
SH16	Non_ASD	Discovery	M	73	0	0	0	0	1591
SH17	Non_ASD	Discovery	M	62	0	0	0	0	1465
SH21	Non_ASD	Discovery	M	76	0	0	0	0	1527
SH23	Non_ASD	Discovery	M	78	1	0	0	0	1587
SH26	Non_ASD	Discovery	M	60	0	0	0	0	1530
SH27	Non_ASD	Discovery	M	55	1	0	0	0	1612
SH30	Non_ASD	Discovery	M	65	0	0	0	0	1489
SH35	Non_ASD	Discovery	M	66	0	0	0	0	1404
SH36	Non_ASD	Discovery	M	62	0	0	0	0	1475
SH38	Non_ASD	Discovery	M	63	0	0	0	0	1536
SH41	Non_ASD	Discovery	M	69	0	0	0	0	1427
SH43	Non_ASD	Discovery	M	61	0	0	0	0	1477
SH44	Non_ASD	Discovery	M	43	0	0	0	0	1516
SH46	Non_ASD	Discovery	M	45	0	0	0	0	1605
SH50	Non_ASD	Discovery	M	45	0	0	0	0	1500
SH52	Non_ASD	Discovery	M	52	0	0	0	0	1552
SH53	Non_ASD	Discovery	M	21	0	0	0	0	1400
H29	Non_ASD	Discovery	F	45	0	0	0	0	1446
H03	Non_ASD	Validate	F	43	0	0	0	0	1663
H05	Non_ASD	Validate	F	38	0	0	0	0	1677
H15	Non_ASD	Validate	F	25	0	0	0	0	1632
H21	Non_ASD	Validate	F	35	0	0	0	0	1580
H25	Non_ASD	Validate	F	24	0	0	1	1	1455
H27	Non_ASD	Validate	F	35	0	0	0	0	1572
H28	Non_ASD	Validate	F	39	0	0	0	0	1456
H32	Non_ASD	Validate	F	66	0	0	0	0	1417
H36	Non_ASD	Validate	F	65	0	0	0	0	1552
H37	Non_ASD	Validate	F	72	0	0	0	0	1472
H38	Non_ASD	Validate	F	26	0	0	0	0	1648
H39	Non_ASD	Validate	F	50	0	0	0	0	1476
H41	Non_ASD	Validate	F	47	0	0	0	0	1468
H43	Non_ASD	Validate	F	32	0	0	0	0	1445
SH03	Non_ASD	Validate	F	56	0	0	0	0	1471
SH05	Non_ASD	Validate	F	38	0	0	0	0	1488
SH13	Non_ASD	Validate	F	55	0	0	0	0	1362
SH15	Non_ASD	Validate	F	69	0	0	0	0	1413
SH22	Non_ASD	Validate	F	58	0	0	0	0	1500
SH25	Non_ASD	Validate	F	55	0	0	0	0	1492
SH29	Non_ASD	Validate	F	73	0	0	0	0	1450
SH31	Non_ASD	Validate	F	62	0	0	0	0	1563
SH33	Non_ASD	Validate	F	50	0	0	0	0	1459
SH37	Non_ASD	Validate	F	55	0	0	0	0	1515
SH42	Non_ASD	Validate	F	64	0	0	0	0	1478
SH48	Non_ASD	Validate	F	24	0	0	0	0	1514
SH49	Non_ASD	Validate	F	56	0	0	0	0	1478
A107	ASD	Validate	M	8	1	0	0	0	1533
A121	ASD	Validate	M	5	0	0	0	0	1495
A131	ASD	Validate	M	2	0	1	1	1	1513
A137	ASD	Validate	M	3	0	0	0	0	1527
A139	ASD	Validate	M	1	0	0	1	1	1518
A145	ASD	Validate	F	2	0	0	0	0	1441
A148	ASD	Validate	M	2	0	0	0	0	1590
A153	ASD	Validate	F	2	0	1	0	0	1617
A156	ASD	Validate	M	6	0	0	0	0	1592
A16	ASD	Validate	M	3	0	0	0	0	1486
A163	ASD	Validate	M	2	1	1	0	0	1538
A166	ASD	Validate	M	3	0	0	0	0	1554
A169	ASD	Validate	M	3	0	0	0	0	1535
A175	ASD	Validate	M	4	0	1	0	0	1594
A178	ASD	Validate	M	2	1	0	0	0	1538
A187	ASD	Validate	M	5	0	0	1	1	1488
A19	ASD	Validate	M	4	1	0	1	1	1530
A194	ASD	Validate	M	3	1	1	1	1	1630
A25	ASD	Validate	F	2	0	0	0	0	1398
A29	ASD	Validate	M	2	0	0	0	0	1468
A32	ASD	Validate	M	2	0	0	0	0	1463
A39	ASD	Validate	M	2	0	0	0	0	1585
A46	ASD	Validate	M	3	1	0	0	0	1567
A49	ASD	Validate	M	3	0	0	0	0	1545
A57	ASD	Validate	F	6	0	0	1	1	1405
A62	ASD	Validate	M	2	0	0	0	0	1476
A65	ASD	Validate	M	2	0	0	0	0	1499
A70	ASD	Validate	M	6	0	0	0	0	1531
A82	ASD	Validate	M	2	0	0	0	0	1581
A83	ASD	Validate	M	2	0	0	0	0	1579
A86	ASD	Validate	M	2	0	0	1	1	1506
A92	ASD	Validate	M	6	0	0	0	0	1586
A95	ASD	Validate	F	11	0	0	0	0	1418
A98	ASD	Validate	M	3	0	0	0	0	1602
Ay023	ASD	Validate	F	4	0	0	0	0	1527
H06	Non_ASD	Validate	M	44	0	0	0	0	1489
H09	Non_ASD	Validate	M	33	0	0	0	0	1461
H10	Non_ASD	Validate	M	34	0	0	0	0	1565
H17	Non_ASD	Validate	M	34	0	0	0	0	1626
H18	Non_ASD	Validate	M	44	0	0	0	0	1476
H19	Non_ASD	Validate	M	24	0	0	0	0	1503
H22	Non_ASD	Validate	M	23	0	0	0	0	1539
H23	Non_ASD	Validate	M	39	0	0	0	0	1679
H30	Non_ASD	Validate	M	40	0	0	0	0	1397
H44	Non_ASD	Validate	M	26	0	0	0	0	1496
H47	Non_ASD	Validate	M	37	0	0	0	0	1626
H48	Non_ASD	Validate	M	53	0	0	0	0	1461
H51	Non_ASD	Validate	M	47	0	0	0	0	1336
H52	Non_ASD	Validate	M	25	0	0	0	0	1426
H53	Non_ASD	Validate	M	28	0	0	0	0	1475
SH04	Non_ASD	Validate	M	61	0	0	0	0	1624
SH06	Non_ASD	Validate	M	20	0	0	0	0	1530
SH08	Non_ASD	Validate	M	32	0	0	0	0	1527
SH09	Non_ASD	Validate	M	36	0	0	0	0	1518
SH18	Non_ASD	Validate	M	55	0	0	0	0	1592
SH32	Non_ASD	Validate	M	70	0	0	1	1	1541
SH39	Non_ASD	Validate	M	70	0	0	0	0	1381
SH51	Non_ASD	Validate	M	31	0	0	0	0	1645
H40	Non_ASD	Validate	F	45	0	0	0	0	1418
SH28	Non_ASD	Validate	F	45	0	0	0	0	1411
